# Supplementary material for: The endosomal Q-SNARE, Syntaxin 7, defines a rapidly replenishing synaptic vesicle recycling pool in hippocampal neurons
Source: PubMed Central journal article supplement (PMC8373932; doi:10.1038/s42003-021-02512-4), 2021-08-18
Supplement: 42003_2021_2512_MOESM3_ESM.pdf [file 42003_2021_2512_MOESM3_ESM.pdf]

## Description of Additional Supplementary Files

**File name:** Supplementary Data 1

**Description:** Detailed data for Figures 1e-h, 2c, d, 3d-f, 4, 5, 6c-g, and 7b, c.
